# Supplementary material for: Insights into the competitive adsorption of pollutants on a mesoporous alumina–silica nano-sorbent synthesized from coal fly ash and a waste aluminium foil
Source: Royal Society of Chemistry journal article supplement (doi:10.1039/d0ra01397h), 2020-01-01
Supplement: d0ra01397h1.pdf [file d0ra01397h1.pdf]

## Supporting Information

### Insights into the competitive adsorption of pollutants on mesoporous alumina silica nano-sorbent synthesized from coal fly ash and waste aluminium foil

Aditi Chatterjee, Shahnawaz Shamim, Amiya Kumar Jana and Jayanta Kumar Basu\*

\*E-mail address: [jkb@che.iitkgp.ernet.in](mailto:jkb@che.iitkgp.ernet.in) (Jayanta Kumar Basu)

Department of Chemical Engineering, Indian Institute of Technology–Kharagpur,  
India–721302

---

#### Figs. of Contents:

**Fig. S1.** XRD spectrum for (a) fly ash and (b) SiA-2

**Fig. S2.** FTIR spectrum of (a) fly ash and (b) SiA-2

**Fig. S3.** SEM image of (a) fly ash and (b) SiA-2

**Fig. S4.** HR-TEM image of SiA-2

**Fig. S5.** The Nitrogen adsorption desorption isotherm plots of (a) fly ash and (b) SiA-2

**Fig. S6.** Zeta potential versus pH curve of SiA-2

**Fig. S7.** Effect of pH on Pb(II) and MG adsorption (initial Pb(II) concentration: 300 mg L<sup>-1</sup>; initial MG concentration: 500 mg L<sup>-1</sup>; adsorbent dosage: 1 g L<sup>-1</sup>; temperature: 303 K)

**Fig. S8.** Effect of adsorbent dosage on Pb(II) and MG (a) % Adsorption and (b) uptake (initial Pb(II) concentration: 100 mg L<sup>-1</sup>; initial MG concentration: 100 mg L<sup>-1</sup>; pH: 6; temperature: 303 K)

**Fig. S9.** Intra -particle diffusion model fit with adsorption kinetic data of (a) MG single component, (b) Pb(II) single component, (c) MG binary solution and (d) Pb(II) binary solution.

**Fig. S10.** Predicted vs. experimental values of adsorption uptake for (a) Pb(II) and (b) MG

**Fig. S11.** Adsorption capacity of SiA-2 after reusing for different cycles for Pb(II) and MG (initial Pb(II) concentration: 40 mg L<sup>-1</sup>; initial MG concentration: 50 mg L<sup>-1</sup>; pH: 6; adsorbent dosage: 1 g L<sup>-1</sup>)

#### Table of Contents:

**Table S1** Details of the chemicals used

**Table S2** Result of XRF analysis

**Table S3** Adsorption isotherm parameters for MG and Pb(II) adsorption on SiA-2 from single component solution

**Table S4** Adsorption isotherm parameters for MG and Pb(II) adsorption on SiA-2 from binary component solution

**Table S5** Adsorption kinetics fitting parameters and correlation coefficient for MG and Pb(II) adsorption on SiA-2 from single component solution

**Table S6** Adsorption kinetics fitting parameters and correlation coefficient for MG on SiA-2 from binary component solution

**Table S7** Adsorption kinetics fitting parameters and correlation coefficient for Pb(II) adsorption on SiA-2 from binary component solution

**Table S8** Experimental range and levels of independent variables

**Table S9** Responses for different experimental runs

**Table S10** ANOVA for Pb(II) uptake ( $Y_1$ )

**Table S11** ANOVA for MG uptake ( $Y_2$ )

**Table S12** Thermodynamic parameters for MG and Pb(II) adsorption on SiA-2 in single and binary component solution

## Experimental

**Table S1** Details of the chemicals used

| Component                                                                                                                                                   | CAS Reg. No. | Suppliers         | Purity (%) | Purification method |
|-------------------------------------------------------------------------------------------------------------------------------------------------------------|--------------|-------------------|------------|---------------------|
| Sodium hydroxide                                                                                                                                            | 1310-73-2    | Merck             | 97         | Used as received    |
| Sulphuric acid                                                                                                                                              | 7664-93-9    | Merck             | 98         | Used as received    |
| Hydrochloric acid                                                                                                                                           | 7647-01-0    | Merck             | 35         | Used as received    |
| Lead nitrate                                                                                                                                                | 10099-74-8   | Merck             | 99         | Used as received    |
| Malachite green<br>(IUPAC Name :<br>4-[[4-(Dimethylamino)<br>phenyl](phenyl)methylidene]-<br><i>N,N</i> -dimethylcyclohexa-2,5-<br>dien-1-iminium chloride) | 2437-29-8    | Loba<br>Chemicals | 90         | Used as received    |

### S1. Characterizing nano-sorbent

The elemental analysis of fly ash and developed adsorbent was performed by X-ray fluorescence (XRF) technique (Model: PAN analytical, Axios; The Netherlands). High

resolution X-ray diffraction (XRD) pattern, using PAN analytical diffract meter (Model: PW-3050/60; UK), at 40 kV and 30 mA with  $2\theta$  angle scanning from  $10^{\circ}$  to  $70^{\circ}$  using Cu-K $\alpha$  radiation was recorded to analyze the crystallinity of raw fly ash and prepared nano-sorbent. The chemical bonds and functional groups were recognised by Fourier-Transform Infrared Spectroscopy (FTIR) (Model: Perkin Elmer spectrum 100) within the range of wavenumber from 4000 to 400  $\text{cm}^{-1}$ , pelletizing the samples in KBr (procured from Sisco Research Laboratory Privet Limited; India). The surface area, pore diameter, pore volume and pore distribution were measured by Quantachrome instrument (Model: AUTOSORB-1; UK) using nitrogen adsorption desorption method. The surface topology was checked by scanning electron microscopy (SEM) (Model: MERLIN ZEISS EVO 60 SEM; Germany) and high resolution electron transmission microscope image (HR-TEM) by JEM-2100 HRTEM (Model: JEOL; Japan). HR-TEM analysis was also useful to determine particle size distribution.

### S1.1. XRF, XRD and FTIR analysis

The composition of coal fly ash (raw material) and SiA-2 were determined by XRF analysis. The details of XRF analysis for fly ash and SiA-2 are shown in Table S2.

**Table S2** Result of XRF analysis

| Compon<br>ents | SiO <sub>2</sub><br>(wt%) | Al <sub>2</sub> O <sub>3</sub><br>(wt%) | Fe <sub>2</sub> O <sub>3</sub><br>(wt%) | Na <sub>2</sub> O<br>(wt%) | SO <sub>3</sub><br>(wt%) | MgO<br>(wt%)   | K <sub>2</sub> O<br>(wt%) | CaO<br>(wt%)   |
|----------------|---------------------------|-----------------------------------------|-----------------------------------------|----------------------------|--------------------------|----------------|---------------------------|----------------|
| Fly ash        | 58.787 ±<br>0.01          | 30.422±<br>0.01                         | 4.509±<br>0.01                          | 0.140±<br>0.01             | 0.110±<br>0.01           | 0.707±<br>0.01 | 2.119±<br>0.01            | 0.800±<br>0.01 |
| SiA-2          | 31.596±<br>0.01           | 59.176±<br>0.01                         | 0.482±<br>0.01                          | 6.754±<br>0.01             | 0.973±<br>0.01           | 0.057±<br>0.01 | 0.162±<br>0.01            | 0.141±<br>0.01 |

The XRD pattern of fly ash and SiA-2 are shown in Fig. S1a and S1b, respectively. The XRD patterns of fly ash confirm the presence of iron silicate oxide [ICDD card no. 000110262] at the peak  $16.906^{\circ}$  corresponding to (020) facet. The peak at  $21.034^{\circ}$  corresponding to (211) facet represents potassium aluminium silicate [ICDD card no. 000500437]. The aluminium oxide hydrate [ICDD card no. 000010259] was observed at the diffraction peak of  $26.749^{\circ}$  corresponding to (202) facet,  $36.649^{\circ}$  corresponding to (021) facet and  $50.373^{\circ}$  corresponding to (015) facet. The presence of silicon oxide [ICDD card no. 000110695] was proved by peak at  $31.463^{\circ}$  corresponding to (102) facet. Aluminium silicate (sillimanite) [ICDD card no. 000010626] was observed by diffraction peak at  $33.406^{\circ}$  corresponding to (220) facet,  $41.180^{\circ}$  corresponding to (122) facet and  $60.896^{\circ}$  corresponding

to (340) facet. The trace of silicon oxide (high quartz) peak at  $35.891^{\circ}$  corresponding to (110) plane, and silicon oxide (cristobalite) [ICDD card no. 000040379] peak at  $42.58^{\circ}$  corresponding to (211) facet,  $60.239^{\circ}$  corresponding to (311) facet and  $68.536^{\circ}$  corresponding to (214) facet are also pointed out. From the above discussion it can be concluded that sillimanite, aluminium oxide hydrate and cristobalite has predominance in the crystalline phase of fly ash.

Concurrently, the XRD pattern of SiA-2 the peak at  $21.874^{\circ}$  corresponding to (-201) facet depicts the presence of sodium aluminium silicate (Albite, disordered) [ICDD card no. 000100393]. The change in crystallinity was observed after the alkali treatment followed by calcination. The average crystal size analysed from Scherrer equation is 61.143 and 27.176 nm for fly ash and SiA-2, respectively.

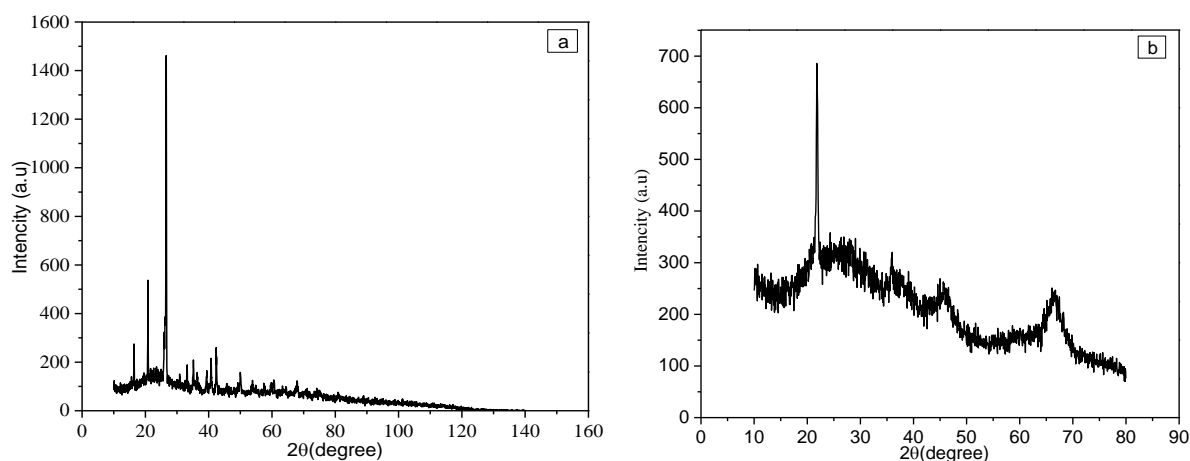

**Fig. S1.** XRD spectrum for (a) fly ash and (b) SiA-2

The FTIR patterns for fly ash and SiA-2 are shown in Fig. S2a and S2b, respectively. The FTIR spectrum of fly ash shown in Fig. S2a confirms the presence of T-OH (T = Si or Al) stretching at  $3314.14\text{ cm}^{-1}$ , the existence of T-H Stretching and T-H bending at  $1873.86$  and  $794.46\text{ cm}^{-1}$ , respectively. Whereas, the bands in the region of  $700 - 600\text{ cm}^{-1}$  represents T-OH bending. At the same time T-O asymmetric stretching is confirmed by the wave number  $1063.17\text{ cm}^{-1}$  and external tetrahedral double ring vibration was represented at  $551.06\text{ cm}^{-1}$ . The FTIR spectrum of SiA-2 shown in Fig. S2b, the peak at  $3565.04\text{ cm}^{-1}$  is due to T-OH stretching, the peaks at  $1634.68$ ,  $632.25$ ,  $625.24\text{ cm}^{-1}$  are attributed to T-OH bending. Whereas, T-O asymmetric stretching is proved by the peak at  $1173.77\text{ cm}^{-1}$  and external tetrahedral double ring vibration is confirmed by  $536.74$ ,  $580.56\text{ cm}^{-1}$ .<sup>1,2</sup> The results confirm the presence of Si-O-Al stretching in alumina silicate cluster, which resembles the powder XRD pattern of the same sample.

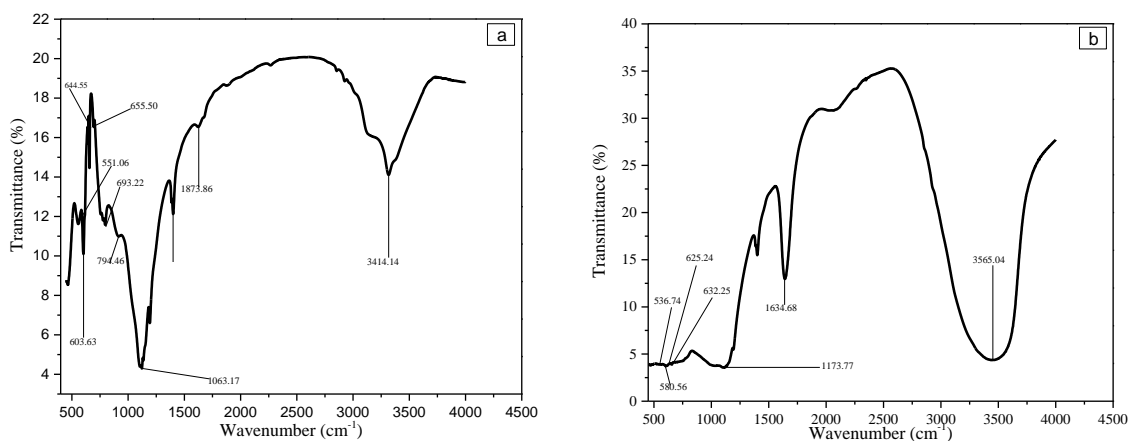

**Fig. S2.** FTIR spectrum of (a) fly ash and (b) SiA-2

### S1.2. Morphology analysis

The surface morphology of fly ash and SiA-2 was checked by scanning electron microscopy (SEM) and the images are shown in Fig. S3 (a and b), respectively. The SEM image of fly ash shows the majority of smooth spherical particles, resemble the earlier reports,<sup>3-6</sup> which may be due to the presence of high silica content. Whereas, the SEM of SiA-2 depicts a flake type structure with sharp edges, which occurs due to alkaline treatment and enhancement of  $\gamma$ -alumina content.

The HR-TEM micrograph of SiA-2 in Fig. S4 reconfirms its flake type structure with sharp edges.

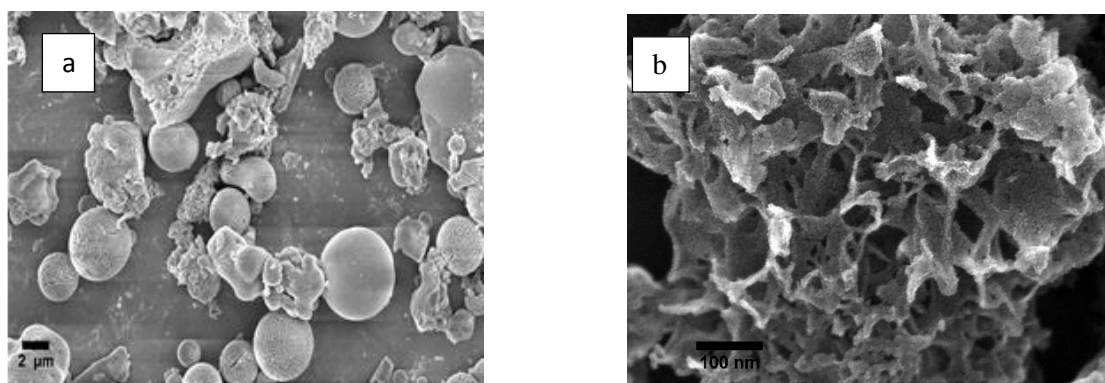

**Fig. S3.** SEM image of (a) fly ash and (b) SiA-2

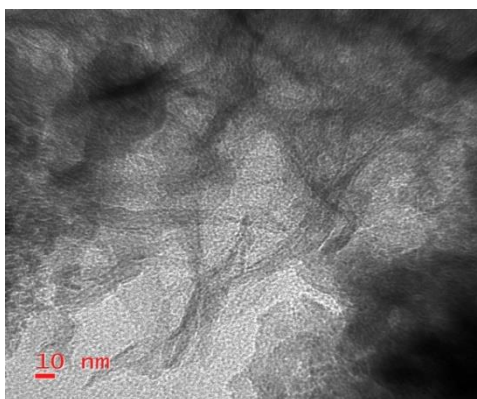

**Fig. S4.** HR-TEM image of SiA-2

### S1.3. BET analysis of the materials

The nitrogen adsorption desorption curve of fly ash in Fig. S5a shows a type (II) hysteresis loop, that suggests disordered pore structure whereas, the narrow pore mouth offers a problem of pore blocking due to capillary condensation. On the other hand, the nitrogen adsorption desorption curve for SiA-2 in Fig. S5b gives the type (III) hysteresis loop, which ensures the slit type pore structure.<sup>4,7</sup> The surface area of raw fly ash was determined as  $2.1 \text{ m}^2 \text{ g}^{-1}$ , which drastically increased to  $136.2 \text{ m}^2 \text{ g}^{-1}$  for SiA-2 due to the increase of  $\gamma$ -alumina content as well as porous structure. The BJH method was exploited to detect the pore diameter and pore volume. Fly ash shows a mesoporous structure with a pore diameter of  $99.3 \text{ \AA}$  with a total pore volume of  $0.005 \text{ cc g}^{-1}$ . Whereas, the pore diameter and pore volume of SiA-2 was determined to be  $147.1 \text{ \AA}$  and  $0.50 \text{ cc g}^{-1}$ , respectively. This phenomenon is consistent with mesoporous nature.

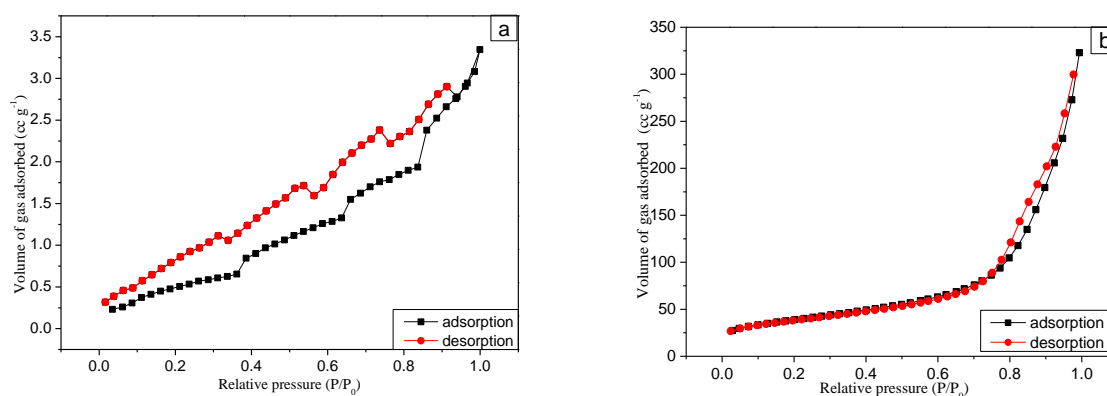

**Fig. S5.** The Nitrogen adsorption desorption isotherm plots of (a) fly ash and (b) SiA-2

### S1.4. Point of zero charge analysis

The point of zero charge ( $\text{pH}_{\text{PZC}}$ ) of SiA-2 particles was determined by measuring its Zeta potential at different pH (2-10) by using MALVERN Zetasizer instrument. The desired pH was maintained by adding dilute HCl and NaOH solution. A plot of Zeta potential versus pH is shown in Fig. S6. The result shows the  $\text{pH}_{\text{PZC}}$  of SiA-2 is at about pH 5.

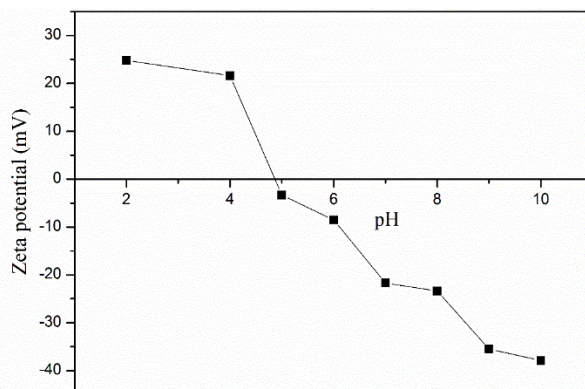

**Fig. S6.** Zeta potential versus pH curve of SiA-2

## S2. Adsorption Experiment

The experiments were performed at 240 rpm in a mechanical shaker. The solutions were kept in conical flasks with known amount of adsorbent dosage till the equilibrium reached and the temperature was maintained in a range of 283-313K. The SiA-2 particles were separated by centrifuge at 8000 rpm for 15 min. The concentration of Pb(II) and MG were measured by Atomic Absorption Spectrophotometer (AAS) (PerkinElmer, PinAAcle 900H) and UV Visible spectrophotometer (Lambda 25, PerkinElmer, USA), respectively. The adsorption uptake at equilibrium ( $q_e$ ) and instantaneous uptake ( $q_t$ ) in  $\text{mg g}^{-1}$  and %Adsorption is calculated as described in previous literatures.<sup>7-10</sup>

### S2.1. Effect of solution pH

In this present work, adsorption capacity of SiA-2 for Pb(II) and MG within a pH range of 2 to 8 was examined and the result is shown in Fig. S7. It is observed that the adsorption process is strongly influenced by pH of the solution. As the solution pH increases, the negative charges on the surface of the adsorbent increases and also the dissociation of the functional groups may occur on the active sites.<sup>11</sup> For MG the adsorption capacity remarkably increases with the increase of pH from 2 to 6, whereas the adsorption capacity becomes almost constant at above pH 6. In case of Pb(II), the adsorption capacity noticeably increases with the increase of solution pH up to 8 and precipitation occurs at above pH 8. As the MG and Pb(II) are charged species, the adsorption is strongly dependent on the point of zero

charge ( $\text{pH}_{\text{PZC}}$ ) of the adsorbent and the molecular nature of the adsorbates. The measurement of zeta potential of SiA-2 was performed to measure the  $\text{pH}_{\text{PZC}}$  and it is seen that zeta potential varies from 24.7 to -37.9, for SiA-2 in the pH range of 2 to 10. The  $\text{pH}_{\text{PZC}}$  was obtained at close to pH 5 (Fig. S6). At a solution pH lower than  $\text{pH}_{\text{PZC}}$  the SiA-2 surface is strongly covered with positive ions, which is not favourable for cations. Whereas, the pH at above  $\text{pH}_{\text{PZC}}$  of the adsorbent, the surface negative charges facilitates the adsorption of positive charged molecules.<sup>11</sup> On the other hand, the malachite green has a tendency to decolourize itself at higher pH<sup>12</sup>, for that reason we have chosen pH 6 as working condition to ensure the reduction of malachite green through adsorption only.

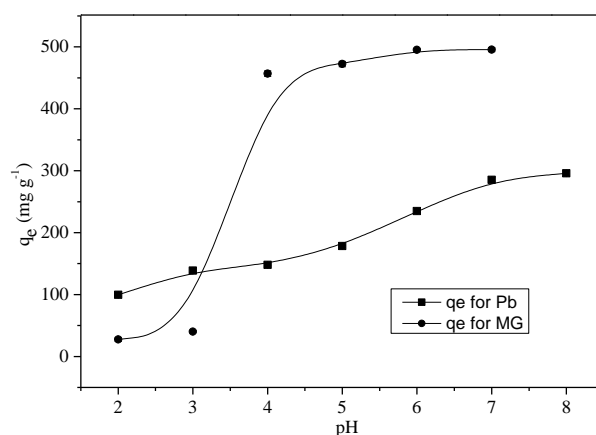

**Fig. S7.** Effect of pH on Pb(II) and MG adsorption (initial Pb(II) concentration:  $300 \text{ mg L}^{-1}$ ; initial MG concentration:  $500 \text{ mg L}^{-1}$ ; adsorbent dosage:  $1 \text{ g L}^{-1}$ ; temperature:  $303 \text{ K}$ )

## S2.2. Effect of adsorption dosage

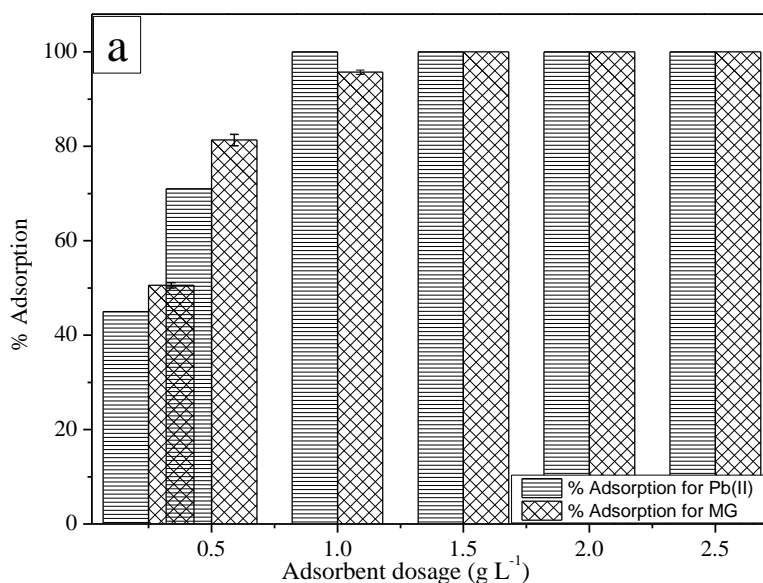



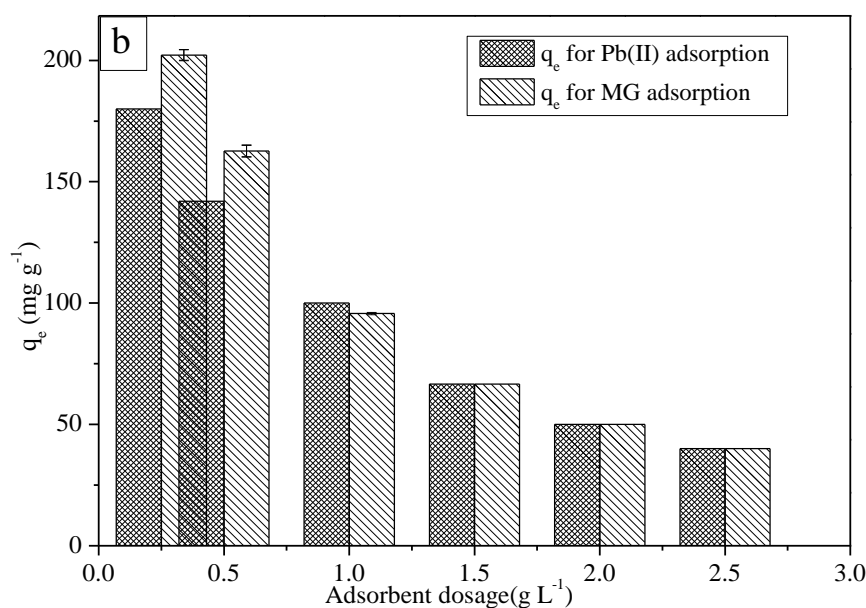

**Fig. S8.** Effect of adsorbent dosage on Pb(II) and MG (a) % Adsorption and (b) uptake (initial Pb(II) concentration: 100 mg L<sup>-1</sup>; initial MG concentration: 100 mg L<sup>-1</sup>; pH: 6; temperature: 303 K)

The effect of adsorbent dosage on adsorption uptake of Pb(II) and MG was observed by varying the adsorbent dosage from 0.25 to 2.5 g L<sup>-1</sup> and at 100 mg L<sup>-1</sup> initial concentration, pH 6, and 303 K temperature. It was observed from the experimental results, which are shown in Fig. S8 (a and b), the adsorption uptake decreases as adsorbent dosage increases and the % Adsorption increases with the increase of adsorbent dosage, up to a adsorption dosage of 1.5 g L<sup>-1</sup>, after that there is no such increase of % Adsorption. As the adsorption dosage increases the available active sites for adsorption increases which results the increase of % Adsorption. On the other hand as the adsorbent dosage increases some active adsorbent site remained unoccupied, as a result the uptake by unit amount of adsorbent was less. From this experimental study it was observed that with an adsorbent dosage of 1 g L<sup>-1</sup>, 100% Pb(II) adsorption was achieved and with an adsorbent dosage of 1.5 g L<sup>-1</sup> 100% MG was adsorbed. This results proved that by using SiA-2 the Pb(II) and MG concentration in water can be reduced to the permissible limit.<sup>13</sup>

### S2.3. Adsorption isotherm models

The Langmuir adsorption isotherm model based on the assumption of identical and energetically equivalent active sites and monolayer adsorption, which follows the equation:

$$q_e = q_m C_e / \left( \frac{1}{b} + C_e \right) \quad (S1)$$

Where  $q_e$  and  $q_m$  are the dye or metal equilibrium uptake ( $\text{mg L}^{-1}$ ) and maximum monolayer adsorption capacity ( $\text{mg L}^{-1}$ ), respectively.  $b$  ( $\text{l/mg}$ ) represents Langmuir equilibrium constant. Whereas, Freundlich adsorption isotherm model describes a heterogeneous adsorption model, which is represented as:

$$q_e = K_f C_e^{1/N} \quad (\text{S2})$$

Where  $K_f$  is the empirical constant, which is used to indicate the adsorption capacity ( $\text{mg}^{1-1/N} \cdot \text{L}^{1/N} \cdot \text{g}^{-1}$ ) and  $N$  is the heterogeneity factor depending on the adsorbent and adsorbate of the system. Concurrently Temkin adsorption isotherm follows the equation:

$$q_e = (RT/b_T) \ln(AC_e) \quad (\text{S3})$$

$(RT/b_T)$  and  $A$  are Temkin constants, here  $(RT/b_T)$  depends on the heat of adsorption ( $\text{J mol}^{-1}$ ) and  $A$  is the equilibrium of binding constant corresponding the maximum binding energy ( $\text{L g}^{-1}$ ).  $R$  and  $T$  are the universal gas constant and the absolute temperature,<sup>14,15</sup> respectively.

In case of binary component solution, the experimental data of equilibrium adsorption isotherm was fitted to extended Langmuir adsorption isotherm model.<sup>16</sup> The equation of extended Langmuir adsorption isotherm model is represented as:

$$q_{e,i} = \frac{(b_i q_{m,i} C_{e,i})}{(1 + \sum b_i C_{e,i})} \quad (\text{S4})$$

The experimental data fitted with the adsorption isotherm models and the values of correlation coefficient and other model parameters are shown in Table S3 and S4 for single and binary component system, respectively.

**Table S3** Adsorption isotherm parameters for MG and Pb(II) adsorption on SiA-2 from single component solution

| Pollutants                  | Adsorption isotherm Model      | Parameters              | Values          |         |        |
|-----------------------------|--------------------------------|-------------------------|-----------------|---------|--------|
|                             |                                |                         | Temperature (K) |         |        |
|                             |                                |                         | 283             | 303     | 318    |
| MG                          | Langmuir adsorption isotherm   | $q_m(\text{mg g}^{-1})$ | 478.887         | 584.334 | 1655.2 |
|                             |                                | $b$                     | 0.0871          | 0.0350  | 0.008  |
|                             |                                | $R^2$                   | 0.931           | 0.992   | 0.984  |
|                             | Freundlich adsorption Isotherm | $k_f$                   | 136.955         | 53.996  | 22.809 |
|                             |                                | $n$                     | 4.358           | 2.721   | 1.302  |
|                             |                                | $R^2$                   | 0.820           | 0.976   | 0.9751 |
| Tempkin adsorption isotherm | $B$                            | 80.636                  | 82.444          | 264.423 |        |
|                             | $A_t$                          | 1.623                   | 0.445           | 0.124   |        |

|        |                     |                   |            |         |         |
|--------|---------------------|-------------------|------------|---------|---------|
|        |                     | $R^2$             | 0.903      | 0.942   | 0.922   |
| Pb(II) | Langmuir adsorption | $q_m(mg\ g^{-1})$ | 193.558    | 291.512 | 326.231 |
|        | isotherm            | $b$               | 0.574      | 0.076   | 0.067   |
|        |                     | $R^2$             | 0.978      | 0.976   | 0.962   |
|        | Freundlich          | $k_f$             | 159.943    | 110.524 | 112.630 |
|        | adsorption          | $n$               | 30.316     | 5.716   | 5.321   |
|        | Isotherm            | $R^2$             | 0.913      | 0.950   | 0.957   |
|        | Tempkin adsorption  | $B$               | 6.087      | 4.781   | 5.167   |
|        | isotherm            | $A_t$             | 5.9824E+10 | 7.5E+19 | 2E+20   |
|        |                     | $R^2$             | 0.8679     | 0.834   | 0.752   |

**Table S4** Adsorption isotherm parameters for MG and Pb(II) adsorption on SiA-2 from binary component solution

| Pollutants | Adsorption isotherm<br>Model    | Parameters        | Values          |        |        |
|------------|---------------------------------|-------------------|-----------------|--------|--------|
|            |                                 |                   | Temperature (K) |        |        |
|            |                                 |                   | 283             | 303    | 318    |
| MG         | Langmuir adsorption<br>isotherm | $q_m(mg\ g^{-1})$ | 103.67          | 391    | 445.03 |
|            |                                 | $b$               | 0.085           | 0.016  | 0.038  |
|            |                                 | $R^2$             | 0.987           | 0.987  | 0.970  |
| Pb(II)     | Langmuir adsorption<br>isotherm | $q_m(mg\ g^{-1})$ | 231.27          | 521.87 | 615.86 |
|            |                                 | $b$               | 0.171           | 0.016  | 0.010  |
|            |                                 | $R^2$             | 0.960           | 0.964  | 0.932  |

#### S2.4. Adsorption kinetics model

The pseudo first order model<sup>15</sup> is established on the assumption that the rate of change of adsorption over time is directly proportional to the difference in saturation concentration and the amount of solid uptake over time. The model follows the equation:

$$\ln(q_e/(q_e - q_t)) = k_1 t \quad (S5)$$

Where,  $q_e$  ( $mg\ g^{-1}$ ) and  $q_t$  ( $mg\ g^{-1}$ ) are the mass of solute adsorbed on adsorbent at equilibrium and at agitation time  $t$  (min), respectively and  $k_1$  ( $min^{-1}$ ) the rate constant for pseudo-first order adsorption.

Pseudo second order equation<sup>15</sup> is based on the assumption that adsorption capacity is proportionate on the active sites on the adsorbent surface. The pseudo second order<sup>15,17</sup> model is represented by the equation:

$$\frac{1}{q_e - q_t} = \frac{1}{q_e} + k_2 t \quad (\text{S6})$$

Here,  $k_2$  is the adsorption rate constant. Elovich adsorption kinetics model<sup>17</sup> is represented by

$$q_t = \frac{1}{\beta} \ln(\beta\alpha) + \frac{1}{\beta} \ln(t) \quad (\text{S7})$$

$\alpha$  and  $\beta$  are the initial adsorption rate ( $\text{mg g}^{-1} \text{min}^{-1}$ ) and the desorption constant ( $\text{mg g}^{-1} \text{min}^{-1}$ ), respectively.

Intraparticle diffusion model<sup>17</sup>, follows the equation:

$$q_t = k_{int} t^{0.5} + C \quad (\text{S8})$$

Where,  $k_{int}$  is the rate constant of intra-particle diffusion model and  $C$  is related to the thickness of the boundary layer. The experimental data of adsorption kinetics were fitted with the adsorption kinetic models<sup>17</sup>, the values of correlation coefficient and other model parameters are listed in Table S5, S6 and S7 for single and binary component systems.

**Table S5** Adsorption kinetics fitting parameters and correlation coefficient for MG and Pb(II) adsorption on SiA-2 from single component solution

| Pollutants                     | Adsorption Kinetic Model                      | Parameters                                  | Values                   |                           |
|--------------------------------|-----------------------------------------------|---------------------------------------------|--------------------------|---------------------------|
|                                |                                               |                                             | 30<br>mg L <sup>-1</sup> | 100<br>mg L <sup>-1</sup> |
| MG                             | Pseudo-first order model                      | $k_1(\text{min}^{-1})$                      | 0.7690                   | 0.8076                    |
|                                |                                               | $q_e(\text{mg g}^{-1})$                     | 27.627                   | 80.3815                   |
|                                |                                               | $R^2$                                       | 0.98782                  | 0.9775                    |
|                                | Pseudo-second order model                     | $k_2(\text{g mg}^{-1} \text{min}^{-1})$     | 0.08181                  | 0.0303                    |
|                                |                                               | $q_e(\text{mg g}^{-1})$                     | 28.2680                  | 81.861                    |
|                                |                                               | $R^2$                                       | 0.99702                  | 0.98456                   |
|                                | Elovich kinetic model                         | $\beta (\text{mg g}^{-1} \text{min}^{-1})$  | 0.93117                  | 0.30093                   |
|                                |                                               | $\alpha (\text{mg g}^{-1} \text{min}^{-1})$ | 6.58877                  | 3.33761                   |
|                                |                                               | $R^2$                                       | 0.99948                  | 0.99143                   |
| Intra particle diffusion model | $k_{int}(\text{mg g}^{-1} \text{min}^{-0.5})$ | 0.4876                                      | 5.6758                   |                           |
|                                | $C$                                           | 25.068                                      | 48.636                   |                           |
|                                | $R^2$                                         | 0.9042                                      | 0.9666                   |                           |

|        |                                |                                               |         |          |
|--------|--------------------------------|-----------------------------------------------|---------|----------|
| Pb(II) | Pseudo-first order model       | $k_1(\text{min}^{-1})$                        | 0.9882  | 0.181    |
|        |                                | $q_e(\text{mg g}^{-1})$                       | 29.941  | 101.6    |
|        |                                | $R^2$                                         | 0.99917 | 0.96543  |
|        | Pseudo-second order model      | $k_2(\text{g mg}^{-1} \text{min}^{-1})$       | 0.2341  | 0.00228  |
|        |                                | $q_e(\text{mg g}^{-1})$                       | 30.16   | 114.0603 |
|        |                                | $R^2$                                         | 0.99972 | 0.9342   |
|        | Elovich kinetic model          | $\beta (\text{mg g}^{-1}\text{min}^{-1})$     | 1.78476 | 0.05547  |
|        |                                | $\alpha (\text{mg g}^{-1}\text{min}^{-1})$    | 368.378 | 157.7582 |
|        |                                | $R^2$                                         | 0.99817 | 0.89916  |
|        | Intra particle diffusion model | $k_{int}(\text{mg g}^{-1} \text{min}^{-0.5})$ | 0.0444  | 0.3336   |
|        |                                | $C$                                           | 29.764  | 97.517   |
|        |                                | $R^2$                                         | 0.9759  | 0.9954   |

**Table S6** Adsorption kinetics fitting parameters and correlation coefficient for MG on SiA-2 from binary component solution

| Pollutants | Adsorption Kinetic Model       | Parameters                                    | Values                                                    |                                                            |                                                              |
|------------|--------------------------------|-----------------------------------------------|-----------------------------------------------------------|------------------------------------------------------------|--------------------------------------------------------------|
|            |                                |                                               | 30 mg L <sup>-1</sup> MG with 5 mg L <sup>-1</sup> Pb(II) | 30 mg L <sup>-1</sup> MG with 30 mg L <sup>-1</sup> Pb(II) | 100 mg L <sup>-1</sup> Mg with 100 mg L <sup>-1</sup> Pb(II) |
| MG         | Pseudo-first order model       | $k_1 (\text{min}^{-1})$                       | 0.79917                                                   | 0.98385                                                    | 0.99893                                                      |
|            |                                | $q_e(\text{mg g}^{-1})$                       | 27.3221                                                   | 25.4750                                                    | 80.1339                                                      |
|            |                                | $R^2$                                         | 0.99405                                                   | 0.99395                                                    | 0.35784                                                      |
|            | Pseudo-second order model      | $k_2(\text{g mg}^{-1} \text{min}^{-1})$       | 0.10232                                                   | 0.15441                                                    | 0.0251                                                       |
|            |                                | $q_e(\text{mg g}^{-1})$                       | 27.8241                                                   | 25.840                                                     | 81.493                                                       |
|            |                                | $R^2$                                         | 0.99907                                                   | 0.99807                                                    | 0.99969                                                      |
|            | Elovich kinetic model          | $\beta (\text{mg g}^{-1}\text{min}^{-1})$     | 1.2493                                                    | 1.61                                                       | 0.51264                                                      |
|            |                                | $\alpha (\text{mg g}^{-1}\text{min}^{-1})$    | 21.2511                                                   | 1.94797                                                    | 4.33299                                                      |
|            |                                | $R^2$                                         | 0.99817                                                   | 0.99942                                                    | 0.99991                                                      |
|            | Intra particle diffusion model | $k_{int}(\text{mg g}^{-1} \text{min}^{-0.5})$ | 0.7793                                                    | 0.113                                                      | 1.3973                                                       |
|            |                                | $C$                                           | 24.056                                                    | 25.079                                                     | 72.989                                                       |
|            |                                | $R^2$                                         | 0.9286                                                    | 0.9376                                                     | 0.9337                                                       |

**Table S7** Adsorption kinetics fitting parameters and correlation coefficient for Pb(II) adsorption on SiA-2 from binary component solution

| Pollutants | Adsorption Kinetic Model       | Parameters                                          | Values                                                    |                                                            |                                                              |
|------------|--------------------------------|-----------------------------------------------------|-----------------------------------------------------------|------------------------------------------------------------|--------------------------------------------------------------|
|            |                                |                                                     | 30 mg L <sup>-1</sup> Pb(II) with 5 mg L <sup>-1</sup> MG | 30 mg L <sup>-1</sup> Pb(II) with 30 mg L <sup>-1</sup> MG | 100 mg L <sup>-1</sup> Pb(II) with 100 mg L <sup>-1</sup> Mg |
| Pb(II)     | Pseudo-first order model       | $k_1$ (min <sup>-1</sup> )                          | 2.3316                                                    | 0.9057                                                     | 0.38307                                                      |
|            |                                | $q_e$ (mg g <sup>-1</sup> )                         | 29.9021                                                   | 26.375                                                     | 99.14                                                        |
|            |                                | $R^2$                                               | 0.9995                                                    | 0.99415                                                    | 0.99959                                                      |
|            | Pseudo-second order model      | $k_2$ (g mg <sup>-1</sup> min <sup>-1</sup> )       | 3.48963                                                   | 0.15263                                                    | 0.0303                                                       |
|            |                                | $q_e$ (mg g <sup>-1</sup> )                         | 29.92637                                                  | 26.73495                                                   | 100.153                                                      |
|            |                                | $R^2$                                               | 0.99951                                                   | 0.99825                                                    | 0.99993                                                      |
|            | Elovich kinetic model          | $\beta$ (mg g <sup>-1</sup> min <sup>-1</sup> )     | 3.11786                                                   | 1.60016                                                    | 0.68114                                                      |
|            |                                | $\alpha$ (mg g <sup>-1</sup> min <sup>-1</sup> )    | 6.62133                                                   | 2.99596                                                    | 8.68302                                                      |
|            |                                | $R^2$                                               | 0.99896                                                   | 0.99502                                                    | 0.99998                                                      |
|            | Intra particle diffusion model | $k_{int}$ (mg g <sup>-1</sup> min <sup>-0.5</sup> ) | 0.0401                                                    | 0.0243                                                     | 0.5585                                                       |
|            |                                | $C$                                                 | 29.787                                                    | 29.846                                                     | 95.705                                                       |
|            |                                | $R^2$                                               | 0.9218                                                    | 0.9081                                                     | 0.9709                                                       |

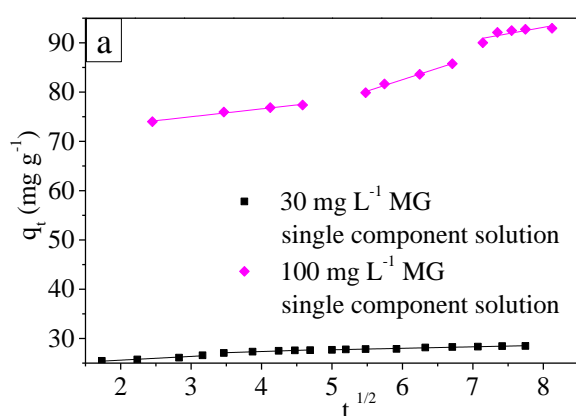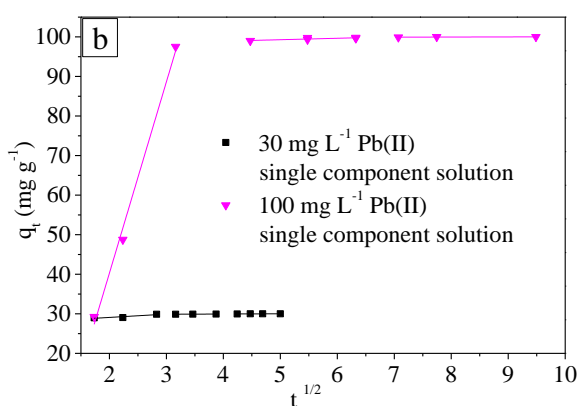

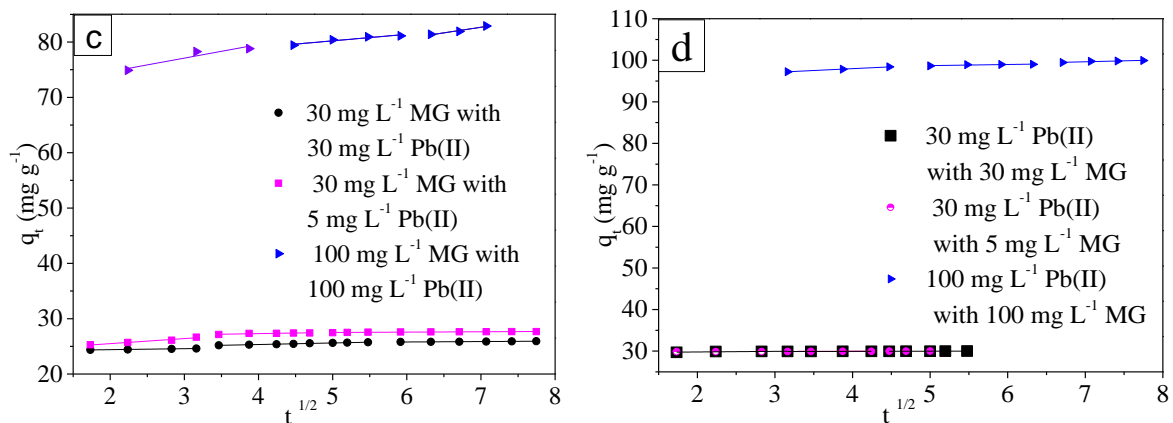

**Fig. S9.** Intra-particle diffusion model fit with adsorption kinetic data of (a) MG single component, (b) Pb(II) single component, (c) MG binary solution and (d) Pb(II) binary solution

### S3. The mechanism of Pb(II) and MG adsorption

The mechanism of Pb(II) adsorption on alumina silica nano-sorbent can be taken into account by ion exchange process. It may be assumed that Pb(II) ions move through the pores and channels to reach the adsorption sites. The Pb(II) ions may replace the exchangeable sodium ions from sodium aluminium silicate structure<sup>16</sup> as shown in Equation S9 and S10. Pb(II) ions may also replace protons as shown in Equation S11 and S12. The basic dye MG will produce cationic ions (CN<sup>+</sup> and CNH<sup>+</sup>) in water. The CN<sup>+</sup> may be adsorbed on the hydroxyl sites following Equation S13<sup>16</sup>.

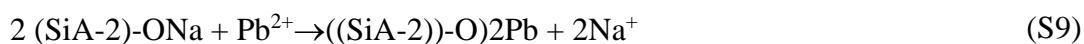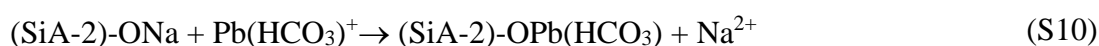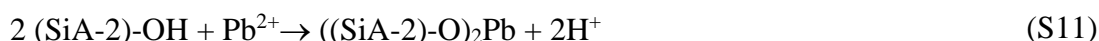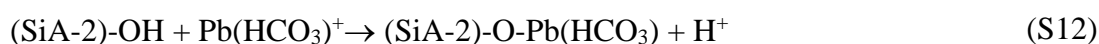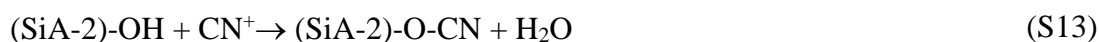

**Table S8** Experimental range and levels of independent variables

| Factor | Name                                  | Minimum | Maximum | Coded     | Coded High | Mean | Std. Dev. |
|--------|---------------------------------------|---------|---------|-----------|------------|------|-----------|
|        |                                       |         |         | Low       |            |      |           |
| A      | Adsorbent dosage (g L <sup>-1</sup> ) | 0.25    | 2.50    | -1 ↔ 0.90 | +1 ↔ 1.85  | 1.37 | 0.44      |

---

|   |                                                          |        |        |             |             |       |       |
|---|----------------------------------------------------------|--------|--------|-------------|-------------|-------|-------|
| B | initial Pb(II)<br>concentration<br>(mg L <sup>-1</sup> ) | 10.00  | 100.00 | -1 ↔ 36.08  | +1 ↔ 73.92  | 55.00 | 17.79 |
| C | initial MG<br>concentration<br>(mg L <sup>-1</sup> )     | 10.00  | 100.00 | -1 ↔ 36.08  | +1 ↔ 73.92  | 55.00 | 17.79 |
| D | pH                                                       | 2.00   | 8.00   | -1 ↔ 3.74   | +1 ↔ 6.26   | 5.00  | 1.19  |
| E | Temperature<br>(K)                                       | 283.00 | 313.00 | -1 ↔ 291.69 | +1 ↔ 304.31 | 24.97 | 5.90  |

---



**Table S9** Responses for different experimental runs

| Run | Factor 1<br>A:Adsorption<br>dosage<br>(g L <sup>-1</sup> ) | Factor 2<br>B:Initial Pb(II)<br>concentration<br>(mg L <sup>-1</sup> ) | Factor 3<br>C:Initial MG<br>concentration<br>(mg L <sup>-1</sup> ) | Factor 4<br>D:pH | Factor 5<br>E:Temperature<br>(K) | Response<br>1<br>Pb(II)<br>uptake<br>(mg g <sup>-1</sup> ) | Response 2<br>MG uptake<br>(mg g <sup>-1</sup> ) |
|-----|------------------------------------------------------------|------------------------------------------------------------------------|--------------------------------------------------------------------|------------------|----------------------------------|------------------------------------------------------------|--------------------------------------------------|
| 1   | 1.85                                                       | 73.92                                                                  | 73.92                                                              | 6.26             | 304.31                           | 39.90                                                      | 39.7232                                          |
| 2   | 0.90                                                       | 36.08                                                                  | 36.08                                                              | 3.74             | 291.70                           | 38.72                                                      | 14.6204                                          |
| 3   | 1.37                                                       | 100                                                                    | 55                                                                 | 5                | 298                              | 72.67                                                      | 29.0456                                          |
| 4   | 0.90                                                       | 36.08                                                                  | 73.92                                                              | 6.26             | 304.31                           | 39.95                                                      | 80.3821                                          |
| 5   | 1.85                                                       | 73.92                                                                  | 36.08                                                              | 3.74             | 291.70                           | 8.776                                                      | 14.0209                                          |
| 6   | 1.85                                                       | 36.08                                                                  | 73.92                                                              | 3.74             | 291.70                           | 2.005                                                      | 37.692                                           |
| 7   | 1.85                                                       | 36.08                                                                  | 36.08                                                              | 3.74             | 291.70                           | 2.005                                                      | 16.7207                                          |
| 8   | 0.25                                                       | 55                                                                     | 55                                                                 | 5                | 298                              | 161.2                                                      | 53.9403                                          |
| 9   | 1.85                                                       | 73.92                                                                  | 36.08                                                              | 6.26             | 291.70                           | 39.90                                                      | 19.55                                            |
| 10  | 1.85                                                       | 73.92                                                                  | 73.92                                                              | 6.26             | 291.70                           | 39.74                                                      | 38.9345                                          |
| 11  | 1.37                                                       | 55                                                                     | 55                                                                 | 2                | 298                              | 0.006                                                      | 35.525                                           |
| 12  | 1.85                                                       | 73.92                                                                  | 73.92                                                              | 3.74             | 304.31                           | 10.86                                                      | 35.8899                                          |
| 13  | 1.85                                                       | 36.08                                                                  | 36.08                                                              | 6.26             | 304.31                           | 18.99                                                      | 10.0865                                          |

---

|    |      |       |       |      |        |       |         |
|----|------|-------|-------|------|--------|-------|---------|
| 14 | 0.90 | 36.08 | 73.92 | 3.74 | 304.31 | 38.77 | 76.0454 |
| 15 | 0.90 | 36.08 | 73.92 | 6.26 | 291.70 | 39.52 | 79.7276 |
| 16 | 2.5  | 55    | 55    | 5    | 298    | 21.96 | 20.789  |
| 17 | 1.37 | 55    | 55    | 5    | 298    | 39.72 | 36.7036 |
| 18 | 0.90 | 73.92 | 73.92 | 6.26 | 291.70 | 80.14 | 52.5906 |
| 19 | 0.90 | 36.08 | 36.08 | 6.26 | 304.31 | 39.84 | 37.4036 |
| 20 | 1.85 | 36.08 | 73.92 | 6.26 | 291.70 | 13.11 | 31.158  |
| 21 | 1.37 | 55    | 100   | 5    | 298    | 39.65 | 75.9123 |
| 22 | 1.37 | 55    | 55    | 5    | 298    | 39.72 | 36.7036 |
| 23 | 1.37 | 55    | 55    | 5    | 313    | 39.94 | 39.654  |
| 24 | 1.85 | 73.92 | 36.08 | 6.26 | 304.31 | 81.67 | 18.7619 |
| 25 | 1.85 | 36.08 | 36.08 | 3.74 | 304.31 | 3.010 | 10.8854 |
| 26 | 0.90 | 36.08 | 36.08 | 6.26 | 291.70 | 39.52 | 33.7113 |
| 27 | 1.37 | 55    | 55    | 5    | 283    | 31.98 | 30.3351 |
| 28 | 0.90 | 73.92 | 36.08 | 3.74 | 291.70 | 66.41 | 20.4378 |
| 29 | 1.85 | 36.08 | 73.92 | 3.74 | 304.31 | 2.009 | 40.97   |
| 30 | 0.90 | 73.92 | 73.92 | 3.74 | 291.70 | 71.19 | 22.2336 |
| 31 | 1.37 | 10    | 55    | 5    | 298    | 39.72 | 37.8532 |
| 32 | 1.37 | 55    | 55    | 8    | 298    | 35.78 | 37.3448 |
| 33 | 1.85 | 36.08 | 36.08 | 6.26 | 291.70 | 19.46 | 9.0183  |
| 34 | 0.90 | 36.08 | 73.92 | 3.74 | 291.70 | 38.71 | 68.1361 |

---

---

|    |       |       |       |      |        |       |         |
|----|-------|-------|-------|------|--------|-------|---------|
| 35 | 0.90  | 73.92 | 36.08 | 6.26 | 291.70 | 81.41 | 33.6659 |
| 36 | 0.90  | 73.92 | 36.08 | 6.26 | 304.31 | 81.16 | 19.2824 |
| 37 | 1.37  | 55    | 55    | 5    | 298    | 39.72 | 36.7036 |
| 38 | 1.37  | 55    | 55    | 5    | 298    | 39.72 | 36.7036 |
| 39 | 1.37  | 55    | 55    | 5    | 298    | 39.72 | 36.7036 |
| 40 | 0.90  | 73.92 | 73.92 | 6.26 | 304.31 | 80.83 | 36.2513 |
| 41 | 0.90  | 73.92 | 36.08 | 3.74 | 304.31 | 74.27 | 3.19625 |
| 42 | 1.37  | 55    | 10    | 5    | 298    | 39.59 | 6.1394  |
| 43 | 1.85  | 36.08 | 73.92 | 6.26 | 304.31 | 19.49 | 39.3448 |
| 44 | 1.37  | 55    | 55    | 5    | 298    | 39.72 | 36.7036 |
| 45 | 1.37  | 55    | 55    | 5    | 298    | 39.72 | 36.7036 |
| 46 | 1.85  | 73.92 | 36.08 | 3.74 | 304.31 | 34.70 | 19.854  |
| 47 | 0.905 | 36.08 | 36.08 | 3.74 | 304.31 | 39.87 | 36.13   |
| 48 | 1.37  | 55    | 55    | 5    | 298    | 39.72 | 36.7036 |
| 49 | 1.85  | 73.92 | 73.92 | 3.74 | 291.70 | 6.008 | 36.7726 |
| 50 | 0.90  | 73.92 | 73.92 | 3.74 | 304.31 | 70.85 | 30.3084 |

---

**Table S10** ANOVA for Pb(II) uptake ( $Y_I$ )

| Source                         | Sum of Squares | df | Mean Square | F-value | p-value  |             |
|--------------------------------|----------------|----|-------------|---------|----------|-------------|
| <b>Model</b>                   | 37691.16       | 20 | 1884.56     | 18.68   | < 0.0001 | significant |
| A-Adsorbent dosage             | 19154.29       | 1  | 19154.29    | 189.90  | < 0.0001 |             |
| B-initial Pb(II) concentration | 7021.38        | 1  | 7021.38     | 69.61   | < 0.0001 |             |
| C-initial MG concentration     | 136.23         | 1  | 136.23      | 1.35    | 0.2546   |             |
| D-pH                           | 2532.04        | 1  | 2532.04     | 25.10   | < 0.0001 |             |
| E-Temperature                  | 274.92         | 1  | 274.92      | 2.73    | 0.1095   |             |
| AB                             | 379.54         | 1  | 379.54      | 3.76    | 0.0622   |             |
| AC                             | 170.23         | 1  | 170.23      | 1.69    | 0.2041   |             |
| AD                             | 796.42         | 1  | 796.42      | 7.90    | 0.0088   |             |
| AE                             | 145.93         | 1  | 145.93      | 1.45    | 0.2388   |             |
| BC                             | 117.31         | 1  | 117.31      | 1.16    | 0.2897   |             |
| BD                             | 424.49         | 1  | 424.49      | 4.21    | 0.0494   |             |
| BE                             | 163.39         | 1  | 163.39      | 1.62    | 0.2132   |             |
| CD                             | 14.55          | 1  | 14.55       | 0.1442  | 0.7069   |             |
| CE                             | 134.66         | 1  | 134.66      | 1.34    | 0.2573   |             |

|                  |          |    |         |        |          |
|------------------|----------|----|---------|--------|----------|
| DE               | 1.76     | 1  | 1.76    | 0.0174 | 0.8960   |
| A <sup>2</sup>   | 3782.60  | 1  | 3782.60 | 37.50  | < 0.0001 |
| B <sup>2</sup>   | 222.25   | 1  | 222.25  | 2.20   | 0.1485   |
| C <sup>2</sup>   | 48.00    | 1  | 48.00   | 0.4758 | 0.4958   |
| D <sup>2</sup>   | 1264.52  | 1  | 1264.52 | 12.54  | 0.0014   |
| E <sup>2</sup>   | 136.06   | 1  | 136.06  | 1.35   | 0.2549   |
| <b>Residual</b>  | 2925.14  | 29 | 100.87  |        |          |
| Lack of Fit      | 2925.14  | 22 | 132.96  |        |          |
| Pure Error       | 0.0000   | 7  | 0.0000  |        |          |
| <b>Cor Total</b> | 40616.31 | 49 |         |        |          |

**Table S11** ANOVA for MG uptake ( $Y_2$ )

| <b>Source</b>                  | <b>Sum of Squares</b> | <b>df</b> | <b>Mean Square</b> | <b>F-value</b> | <b>p-value</b> |             |
|--------------------------------|-----------------------|-----------|--------------------|----------------|----------------|-------------|
| <b>Model</b>                   | 14682.84              | 15        | 978.86             | 27.20          | < 0.0001       | significant |
| A-Adsorbent dosage             | 2123.46               | 1         | 2123.46            | 59.01          | < 0.0001       |             |
| B-initial Pb(II) concentration | 940.04                | 1         | 940.04             | 26.12          | < 0.0001       |             |
| C-initial MG concentration     | 8173.81               | 1         | 8173.81            | 227.15         | < 0.0001       |             |

|                  |          |    |         |        |          |
|------------------|----------|----|---------|--------|----------|
| D-pH             | 232.22   | 1  | 232.22  | 6.45   | 0.0158   |
| E-Temperature    | 18.82    | 1  | 18.82   | 0.5229 | 0.4745   |
| AB               | 1741.81  | 1  | 1741.81 | 48.40  | < 0.0001 |
| AC               | 135.82   | 1  | 135.82  | 3.77   | 0.0604   |
| AD               | 367.31   | 1  | 367.31  | 10.21  | 0.0030   |
| AE               | 8.69     | 1  | 8.69    | 0.2416 | 0.6262   |
| BC               | 618.11   | 1  | 618.11  | 17.18  | 0.0002   |
| BD               | 100.46   | 1  | 100.46  | 2.79   | 0.1039   |
| BE               | 170.90   | 1  | 170.90  | 4.75   | 0.0363   |
| CD               | 0.5403   | 1  | 0.5403  | 0.0150 | 0.9032   |
| CE               | 8.74     | 1  | 8.74    | 0.2428 | 0.6254   |
| DE               | 51.27    | 1  | 51.27   | 1.42   | 0.2409   |
| <b>Residual</b>  | 1223.49  | 34 | 35.98   |        |          |
| Lack of Fit      | 1223.49  | 27 | 45.31   |        |          |
| Pure Error       | 0.0000   | 7  | 0.0000  |        |          |
| <b>Cor Total</b> | 15906.32 | 49 |         |        |          |

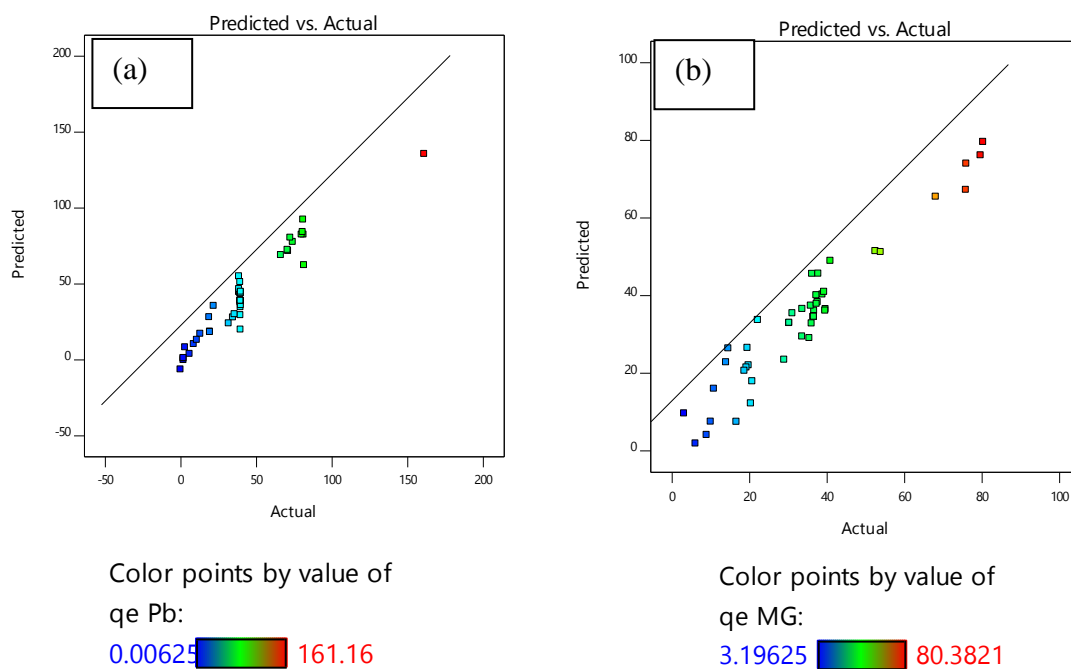

**Fig. S10.** Predicted vs. experimental values of adsorption uptake for (a) Pb(II) and (b) MG

#### S4. Thermodynamic parameters

The values of  $\Delta H^0$ ,  $\Delta S^0$  and  $\Delta G^0$  can be calculated from the following equations:

$$\Delta G^0 = -RT \ln K_d \quad (\text{S14})$$

$$K_d = q_e / C_e \quad (\text{S15})$$

$$\ln K_d = \left( -\Delta H^0 / RT \right) + \left( \Delta S^0 / R \right) \quad (\text{S16})$$

$$\Delta S^0 = \left( \left( \Delta H^0 - \Delta G^0 \right) / T \right) \quad (\text{S17})$$

Here R is the universal gas constant with the value of  $8.314 \text{ J mol}^{-1} \text{ K}^{-1}$  and T is the temperature in K<sup>15</sup>. The value of  $K_d$  can be determined from the slope of  $q_e$  versus  $C_e$ .<sup>18,19</sup> The plot of  $\ln K_d$  versus  $1/T$  was utilized to determine the value of  $\Delta H^0$  and  $\Delta S^0$ .<sup>20</sup>

**Table S12** Thermodynamic parameters for MG and Pb(II) adsorption on SiA-2 in single and binary component solution

| Pollutant                              | $K_d$                  |            |            | $\Delta G^0$            |            |            | $\Delta H^0$            | $\Delta S^0$            |
|----------------------------------------|------------------------|------------|------------|-------------------------|------------|------------|-------------------------|-------------------------|
|                                        | (L mol <sup>-1</sup> ) |            |            | (kJ mol <sup>-1</sup> ) |            |            | (kJ mol <sup>-1</sup> ) | (kJ mol <sup>-1</sup> ) |
|                                        | 283<br>(K)             | 303<br>(K) | 318<br>(K) | 283<br>(K)              | 303<br>(K) | 318<br>(K) |                         |                         |
| MG in single<br>component solution     | 1.02                   | 1.92       | 6.89       | -0.05                   | -1.64      | -5.10      | 39.36                   | 0.14                    |
| Pb(II) in single<br>component solution | 0.33                   | 0.86       | 0.44       | 2.60                    | 0.38       | 2.19       | 51.74                   | 0.16                    |
| MG in binary<br>solution               | 1.36                   | 1.52       | 2.75       | -0.73                   | -1.05      | -2.67      | 14.11                   | 0.05                    |
| Pb(II) in binary<br>solution           | 1.12                   | 1.31       | 1.40       | -0.27                   | -0.69      | -0.90      | 4.89                    | 0.02                    |

### Regeneration

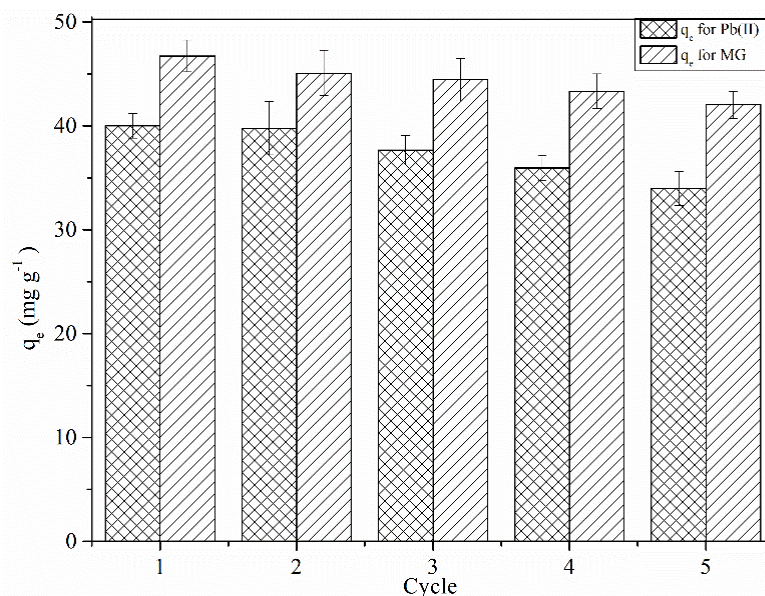

**Fig. S11.** Adsorption capacity of SiA-2 after reusing for different cycles for Pb(II) and MG (initial Pb(II) concentration: 40 mg L<sup>-1</sup>; initial MG concentration: 50 mg L<sup>-1</sup>; pH: 6; adsorbent dosage: 1 g L<sup>-1</sup>)



## NOMENCLATURE

| <b>Symbols</b>          | <b>Statement</b>                                                                         |
|-------------------------|------------------------------------------------------------------------------------------|
| <i>%Adsorption</i>      | percent Pb(II) or MG removal                                                             |
| $\Delta G^0$            | Gibb's free energy change (kJ mol <sup>-1</sup> )                                        |
| $\Delta H^0$            | enthalpy change (kJ mol <sup>-1</sup> )                                                  |
| $\Delta S^0$            | entropy change (kJ mol <sup>-1</sup> K <sup>-1</sup> )                                   |
| <i>A</i>                | equilibrium of binding constant at the maximum binding energy (L g <sup>-1</sup> )       |
| <i>b</i>                | Langmuir adsorption constant                                                             |
| <i>C</i>                | thickness of boundary layer in the equation of intra-particle diffusion model            |
| <i>C<sub>0</sub></i>    | initial Ni(II) concentration of the solution (mg L <sup>-1</sup> )                       |
| <i>C<sub>e</sub></i>    | equilibrium Ni(II) concentration of the solution after adsorption (mg L <sup>-1</sup> )  |
| <i>k<sub>1</sub></i>    | rate constant for pseudo-first order adsorption (min <sup>-1</sup> )                     |
| <i>k<sub>2</sub></i>    | rate constant for pseudo-second order adsorption (g mg <sup>-1</sup> min <sup>-1</sup> ) |
| <i>K<sub>c</sub></i>    | equilibrium constant                                                                     |
| <i>K<sub>f</sub></i>    | Freundlich constants (related to adsorbent capacity)                                     |
| <i>k<sub>int</sub></i>  | rate constant of intra-particle diffusion model                                          |
| <i>m</i>                | mass of adsorbent per unit volume of solution (g)                                        |
| <i>n</i>                | Freundlich constants (adsorption intensity on the adsorbent)                             |
| <i>q<sub>e</sub></i>    | amount of Pb(II) or MG uptake per unit amount of adsorbent (mg g <sup>-1</sup> )         |
| <i>q<sub>m</sub></i>    | maximum monolayer adsorption capacity (mg g <sup>-1</sup> )                              |
| <i>q<sub>t</sub></i>    | mass of solute adsorbed on adsorbent (mg g <sup>-1</sup> ) at agitation time <i>t</i>    |
| <i>R</i>                | universal gas constant (J mol <sup>-1</sup> K <sup>-1</sup> )                            |
| <i>R<sub>L</sub></i>    | separation factor constant                                                               |
| <i>RT/b<sub>T</sub></i> | related to the heat of adsorption (J mol <sup>-1</sup> )                                 |
| <i>T</i>                | absolute temperature (K)                                                                 |
| <i>t</i>                | agitation time (min)                                                                     |
| <i>V</i>                | volume of solution (L)                                                                   |
| <i>α</i>                | initial adsorption rate (mg g <sup>-1</sup> min <sup>-1</sup> )                          |
| <i>β</i>                | desorption constant (mg g <sup>-1</sup> min <sup>-1</sup> )                              |

## Reference

- 1 G. H. Bai, W. Teng, X. G. Wang, J. G. Qin, P. Xu and P. C. Li, *Trans. Nonferrous Met. Soc. China (English Ed.)*, 2010, **20**, s169–s175.
- 2 B. Stuart, *Infrared Spectroscopy: Fundamentals and Applications*, John Wiley and sons, LTD, New Jersey, United States, 2004.
- 3 A. Asfaram, M. Ghaedi, S. Hajati, A. Goudarzi and A. A. Bazrafshan, *Spectrochim. Acta - Part A Mol. Biomol. Spectrosc.*, 2015, **145**, 203–212.
- 4 M. R. El-Naggar, A. M. El-Kamash, M. I. El-Dessouky and A. K. Ghonaim, *J. Hazard. Mater.*, 2008, **154**, 963–972.
- 5 Z. Sarbak, A. Stańczyk and M. Kramer-Wachowiak, *Powder Technol.*, 2004, **145**, 82–87.
- 6 K. Ojha, N. C. Pradhan and A. N. Samanta, *Bull. Mater. Sci.*, 2004, **27**, 555–564.
- 7 M. I. Khan, T. K. Min, K. Azizli, S. Su, H. Ullah, Z. Man, S. Sufian, H. Ullah and Z. Man, *RSC Adv.*, 2015, **5**, 61410–61420.
- 8 M. Rafatullah, O. Sulaiman, R. Hashim and A. Ahmad, *J. Hazard. Mater.*, 2009, **170**, 969–977.
- 9 S. Hajati, M. Ghaedi and S. Yaghoubi, *J. Ind. Eng. Chem.*, 2015, **21**, 760–767.
- 10 A. Chatterjee, J. K. Basu and A. K. Jana, *Powder Technol.*, 2019, **354**, 792–803.
- 11 L. Zhang, H. Zhang, W. Guo and Y. Tian, *Appl. Clay Sci.*, 2014, **93–94**, 85–93.
- 12 S. Ayhan, E. Bulut, M. Özacar and I. A. Şengil, *Microporous Mesoporous Mater.*, 2008, **115**, 234–246.
- 13 M. Ahmaruzzaman, *Adv. Colloid Interface Sci.*, 2011, **166**, 36–59.
- 14 S. Deng and Y. P. Ting, *Langmuir*, 2005, **21**, 5940–5948.
- 15 N. M. Mahmoodi, B. Hayati and M. Arami, *J. Chem. Eng. Data*, 2010, **55**, 4638–4649.
- 16 S. Wang and E. Ariyanto, *J. Colloid Interface Sci.*, 2007, **314**, 25–31.
- 17 H. Mazaheri, M. Ghaedi, A. Asfaram and S. Hajati, *J. Mol. Liq.*, 2016, **219**, 667–676.
- 18 M. F. Sawalha, J. R. Peralta-Videa, J. Romero-González and J. L. Gardea-Torresdey, *J. Colloid Interface Sci.*, 2006, **300**, 100–104.
- 19 Y. Liu, *J. Chem. Eng. Data*, 2009, **54**, 1981–1985.
- 20 Y. Liu, C. Yan, Z. Zhang, H. Wang, S. Zhou, W. Zhou, H. Wang, Y. Liu, W. Zhou, Z. Zhang, C. Yan, Z. Zhang, H. Wang, S. Zhou and W. Zhou, *Fuel*, 2016, **185**, 181–189.
